# Supplementary material
Source: PubMed Central journal article supplement (PMC3369218)
Supplement: NIHMS381736-supplement-Supplementary_Data.pdf [file NIHMS381736-supplement-Supplementary_Data.pdf]

# Understanding how the distal environment directs reactivity in chlorite dismutase: spectroscopy and reactivity of Arg183 mutants

*Béatrice Blanc, Jeffery Mayfield, Claudia A. McDonald, Gudrun S. Lukat-Rodgers, Kenton R. Rodgers, Jennifer L. DuBois*

## **Contents:**

**Figure S1.** R183Q mutant UV/visible pH titrations from pH 7 to 3, pH 7 to 11 and pH 8.5 to 12

**Figure S2.** R183A mutant UV/visible pH titrations from pH 6.1 to 4, pH 7 to 10.6 and pH 8.8 to 12.8

**Figure S3.** R183K mutant UV/visible pH titrations from pH 6.1 to 2.8, pH 7 to 10.9 and pH 10 to 12.9

**Figure S4.** Soret-excited, high frequency window rR spectra of Cld mutants as a function of pH.

**Figure S5.** High frequency rR spectra of ferrous Cld(R183Q) at pH 7.8 and 10.0. Spectra were acquired with 406.7 nm excitation and 15 mW at the sample. Inset: The low-frequency window of the rR spectrum of ferrous Cld(R183Q) at pH 7.8 and 10.0 obtained with 441.6 nm excitation.

**Figure S6.** Resonance Raman characterization of ferrous Cld(R183A) in 100 mM sodium phosphate, pH 6.8. (A) The high frequency window rR spectrum acquired with 413.1 nm excitation and 18 mW at the sample. (B) The low-frequency window of the rR spectrum of ferrous Cld(R183A) obtained with 441.6 and 413.1 nm excitation.

**Figure S7.** UV-visible spectra of ferrous Cld(R183K) as a function of pH. Samples were prepared in 100 mM sodium phosphate, pH 6.8 or 100 mM Ches pH 10.0 and reduced with sodium dithionite.

**Figure S8.** Fit of WT *Da*Cld-CO rR data (pH 5.8) for determination of the Fe-C stretching frequency of the two conformers.

**Figure S9.** Soret-excited rR spectra of WT Cld-CO as a function of pH.

**Figure S10.** Resonance Raman spectra and fits for the low frequency data for the isotopomers of Cld(R183Q)-CO at (A) pH 6.8 and (B) pH 10.0; The original data is in black; blue indicates the component peaks and red shows the calculated fit.

**Table S1.** Comparison of Fe-CO vibrational frequencies for several heme proteins that were used to construct Figure 7 in the paper. The frequencies are reported for pH 6.8 unless otherwise indicated. The frequencies for Cld-<sup>13</sup>C CO complexes are in parentheses.

**Figure S1:** UV visible pH titration for the R183Q mutant (A) pH 6.8, 6.5, 6.1, 5.8, 5.5, 5, 3.8 (B) pH 6.8, 7.3, 7.7, 8.2, 8.7, 9.4, 10, 10.5, 10.9 and (C) pH 8.4, 9.3, 9.9, 10.3, 10.6, 10.9, 11.6, 12.1

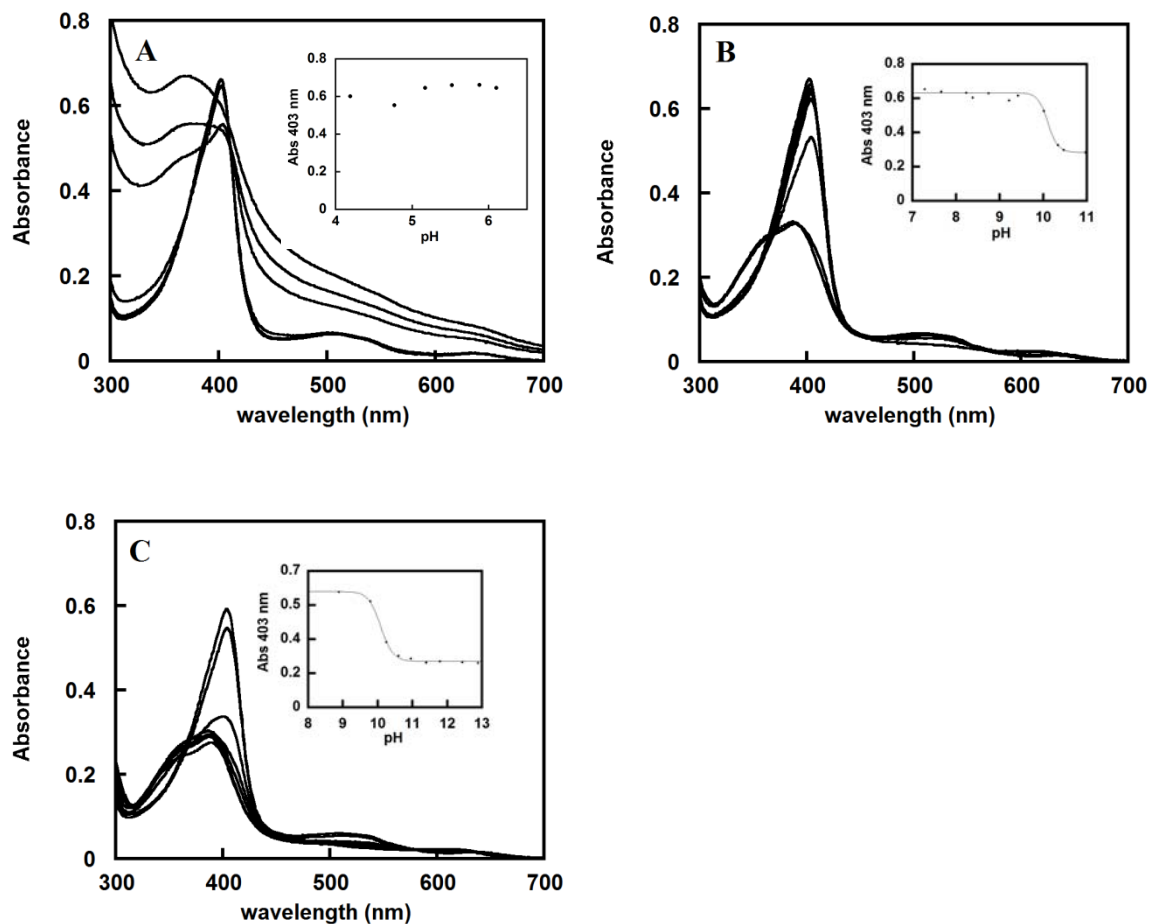

**Figure S2:** UV/visible pH titrations for mutant R183A at (A) pH 6.8, 6.5, 6.1, 5.8, 5.5, 5, 3.8 (B) pH 6.8, 7.2, 7.5, 7.9, 8.3, 8.9, 9.5, 9.9, 10.2, 10.4, 10.6 and (C) pH 8.4, 9.3, 9.9, 10.3, 10.6, 10.9, 11.6, 12.1

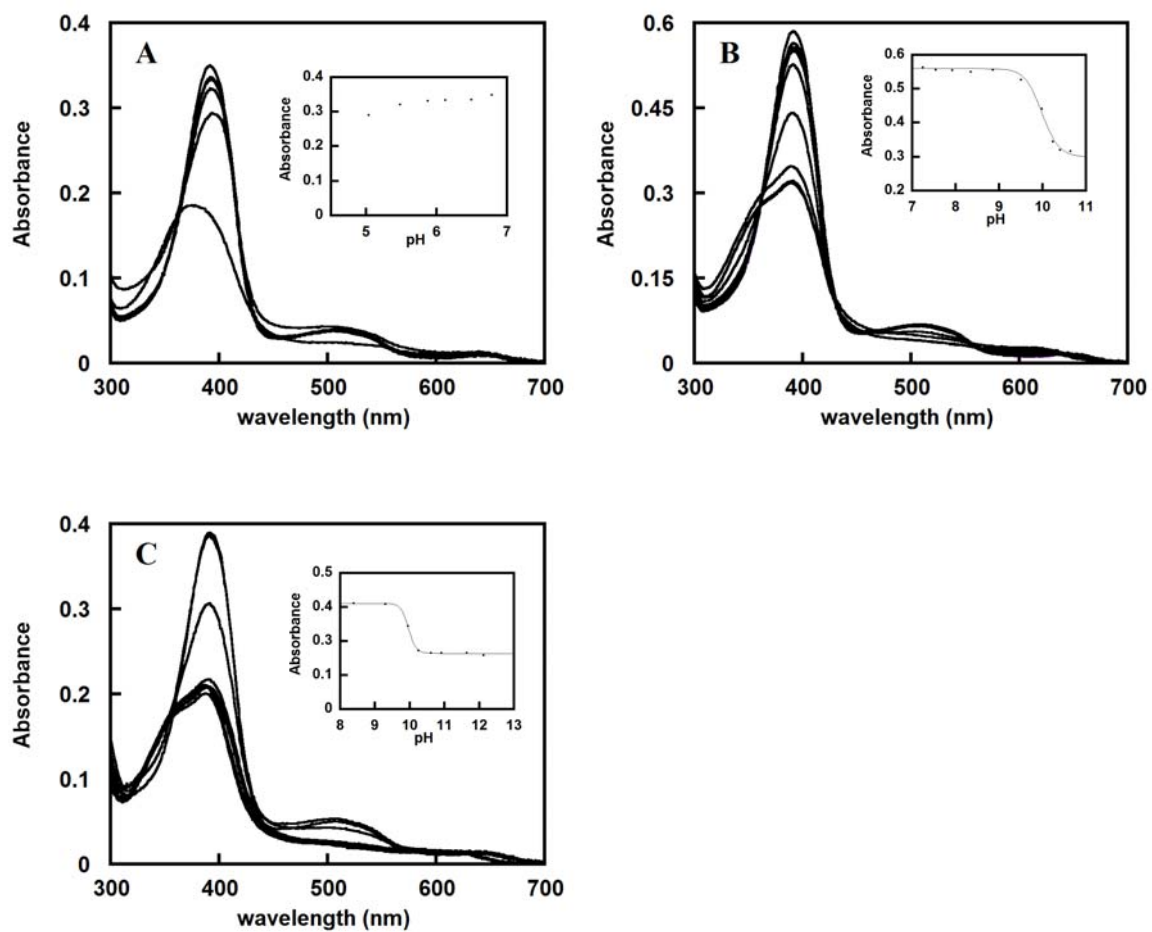

**Figure S3:** UV/visible pH titrations for mutant R183K at pH 6.2, 5.8, 5.4, 4.9, 4.2, 3.8, 3.3, 2.8 (B) at pH 6.9, 7.1, 7.3, 7.5, 7.8, 7.9, 8.9, 9.4, 10. 10.5, 10.9 and (C) at pH 10.04, 10.4, 10.9, 11.2, 11.6, 11.9, 12.5, 12.9

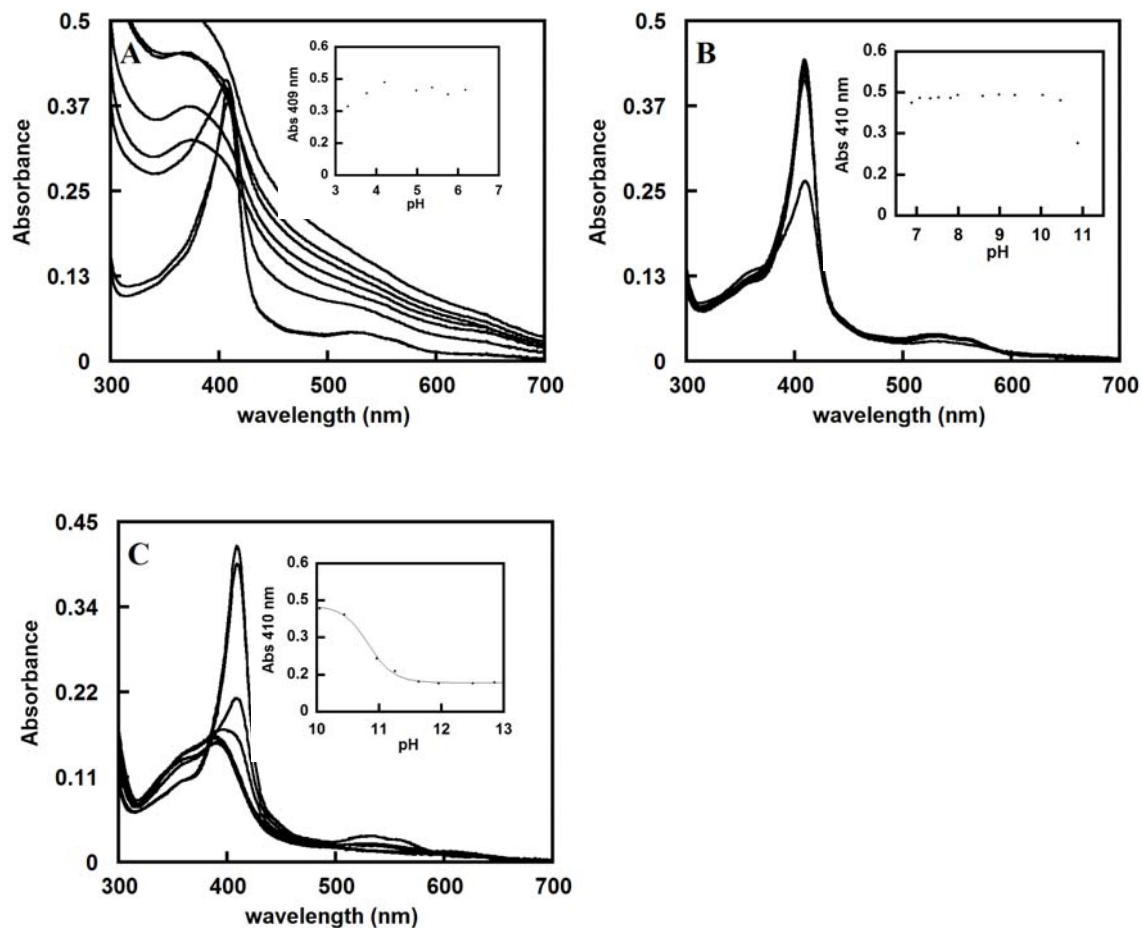

**Figure S4.** Soret-excited, high frequency window rR spectra of Cld mutants as a function of pH. Samples were prepared in 100 mM sodium phosphate, pH 6.8, 100 mM Tris/HCl pH 7.8, 100 mM Tris/HCl pH 8.8, 100 mM Ches pH 10.0 and 100 mM MES pH 5.5. Spectra were collected with 406.7 nm excitation and 14 mW at the sample. A) Cld(R183K) spectra compared to the spectrum of WT Cld at pH 10, B) Cld(R183A) spectra, and C) Cld(R183Q) spectra compared to WT Cld at pH 6.8.

\* indicates plasma emission lines.

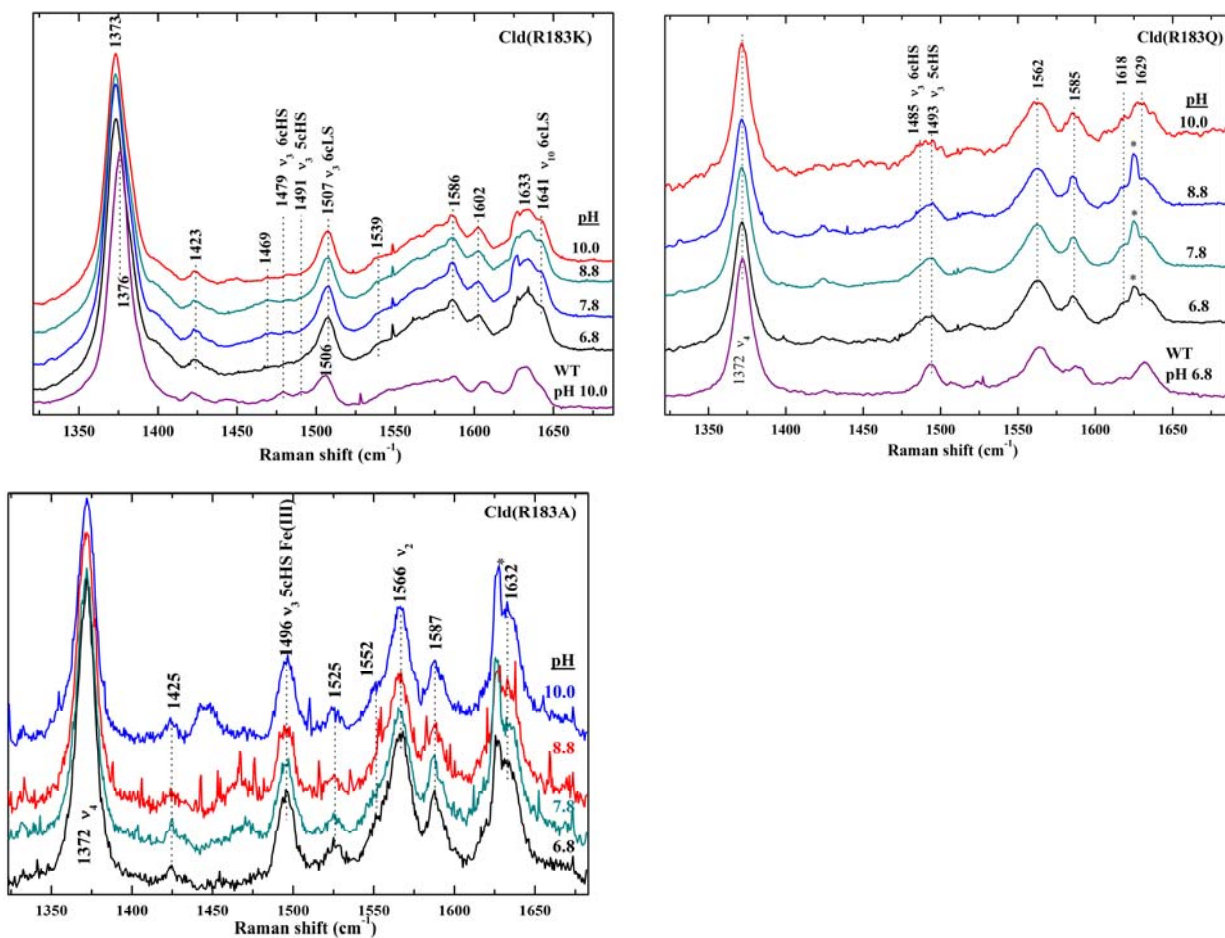

**Figure S5.** High frequency rR spectra of ferrous Cld(R183Q) at pH 7.8 and 10.0. Spectra were acquired with 406.7 nm excitation and 15 mW at the sample. Inset: The low-frequency window of the rR spectrum of ferrous Cld(R183Q) at pH 7.8 and 10.0 obtained with 441.6 nm excitation.

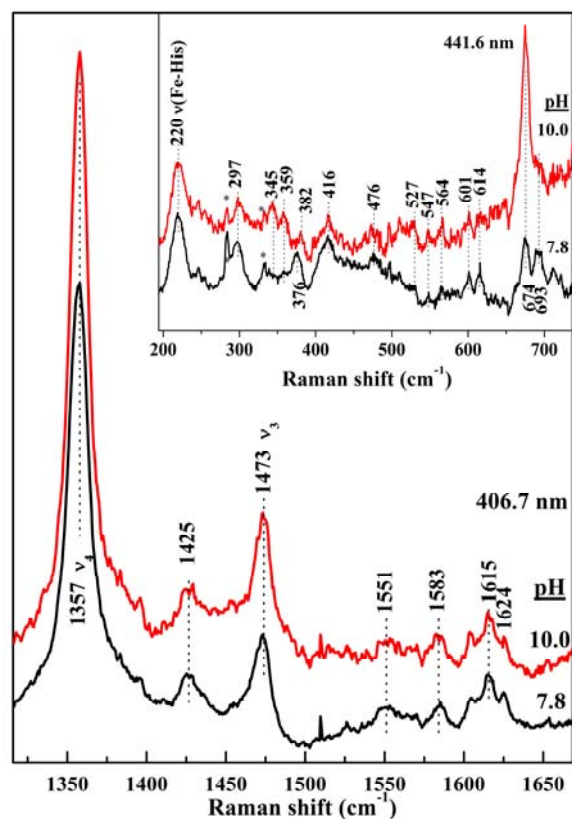

**Figure S6.** Resonance Raman characterization of ferrous Cld(R183A) in 100 mM sodium phosphate, pH 6.8. (A) The high frequency window rR spectrum acquired with 413.1 nm excitation and 18 mW at

the sample. (B) The low-frequency window of the rR spectrum of ferrous Cld(R183A) obtained with 441.6 and 413.1 nm excitation.

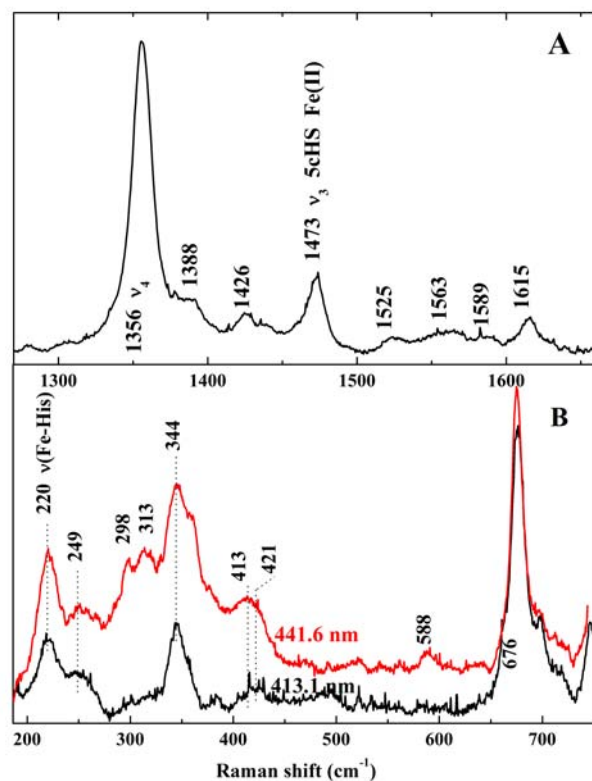

**Figure S7.** UV-visible spectra of ferrous Cld(R183K) as a function of pH. Samples were prepared in 100 mM sodium phosphate, pH 6.8 or 100 mM Ches pH 10.0 and reduced with sodium dithionite.



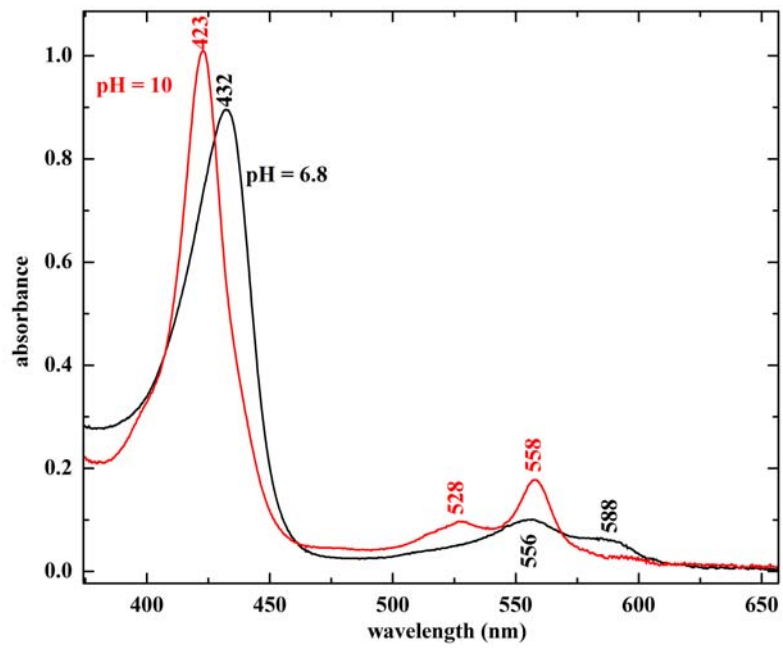

**Figure S8.** Fit of WT DaCld-CO rR data (pH 5.8) determine the Fe-C stretching frequency of the two conformers. Spectra were acquired with 413.1 nm excitation. Original spectrum is in black, fit peaks are in blue, and the simulated spectrum is in red. The simulated difference spectrum was generated by subtraction of the simulated spectra.

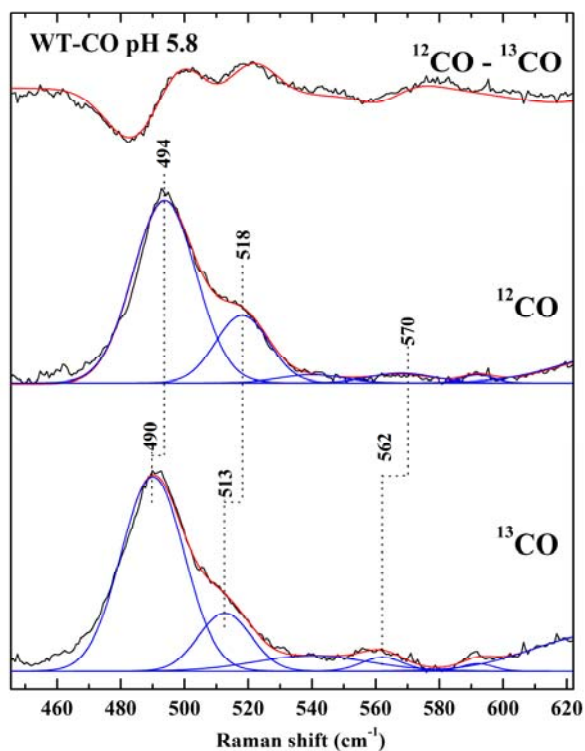

**Figure S9.** Soret-excited rR spectra of WT Cld-CO as a function of pH.

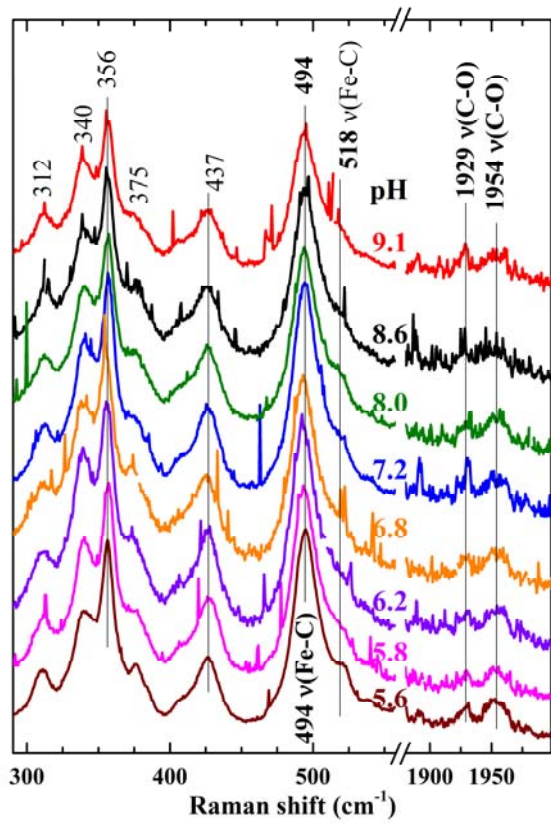

**Figure S10.** Resonance Raman spectra and fits for the low frequency data for the isotopomers of Cld(R183Q)-CO at (A) pH 6.8 and (B) pH 10.0. The original data is in black; blue indicates the component peaks and red shows the calculated fit.

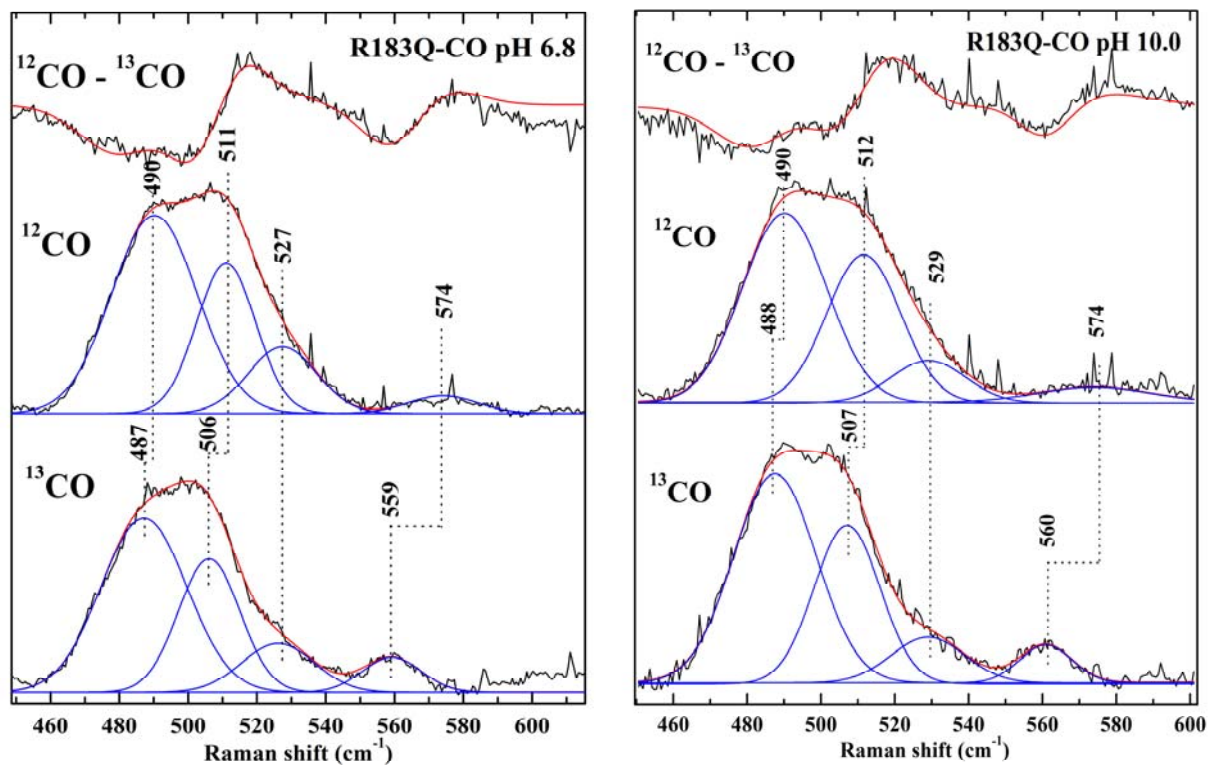

**Table S1:** Comparison of Fe-CO vibrational frequencies for several heme proteins that were used to construct Figure 7 in the paper. The frequencies are reported for pH 6.8 unless otherwise indicated. The frequencies for Cld-<sup>13</sup>CO complexes are in parentheses.

| <b>Fe(II)-CO</b>       |         | <b><math>\nu_{\text{Fe-C}}</math></b> | <b><math>\nu_{\text{C-O}}</math></b> | $\frac{\Delta\nu_{\text{Fe-C Mut}} - \nu_{\text{Fe-C WT}}}{\Delta\nu_{\text{C-O Mut}} - \nu_{\text{C-O WT}}}$ | <b>Ref</b> |
|------------------------|---------|---------------------------------------|--------------------------------------|---------------------------------------------------------------------------------------------------------------|------------|
| WT <i>Da</i> Cld       | closed  | 518(513)                              | 1929(1984)                           |                                                                                                               | This work  |
|                        | open    | 494(491)                              | 1954(1908)                           | -24/+25 <sup>a</sup>                                                                                          |            |
| <i>Da</i> Cld(R183K)   | open    | 491(488)                              | 1956(1914)                           | -3/+2 <sup>b</sup><br>-27/+27 <sup>c</sup>                                                                    |            |
| <i>Da</i> Cld(R183Q)   | closed  | 511(506)                              | 1935(1891)                           | -7/+6                                                                                                         |            |
|                        | open    | 490(487)                              | 1958(1915)                           | -3/+4 <sup>b</sup><br>-28/+29 <sup>c</sup>                                                                    |            |
| <i>Da</i> Cld(R183A)   | open    | 488(486)                              | 1964(1918)                           | -6/+10 <sup>b</sup><br>-30/+35 <sup>c</sup>                                                                   |            |
|                        |         |                                       |                                      |                                                                                                               |            |
| HRPC acidic pH         |         | 492                                   | 1967                                 |                                                                                                               | (1,2)      |
| HRPC pH 6              | form I  | 539                                   | 1906                                 |                                                                                                               |            |
|                        | form II | 516                                   | 1934                                 |                                                                                                               |            |
| HRPC alkaline pH       |         | 530                                   | 1934                                 |                                                                                                               |            |
| HRPC(R38L) pH 6.0      |         | 515                                   | 1941.5                               | -24/+35.5<br>-1/+7.5                                                                                          |            |
| HRPC(R38L) alkaline pH |         | 496                                   | 1944                                 | -34/+10                                                                                                       |            |
| HRPC(H42L) pH 6-9.5    |         | 525                                   | 1924                                 | -14/+18 (form I)<br>+9/-10 (form II)                                                                          |            |
| CcP pH 7.0             |         | 530                                   | 1922                                 |                                                                                                               | (3)        |

|                                    |  |     |        |         |       |
|------------------------------------|--|-----|--------|---------|-------|
| CcP alkaline pH                    |  | 503 | 1948   |         |       |
| CcP(R48L)<br>acidic pH             |  | 500 | 1941   | -30/+19 | (4)   |
| CcP(R48L)<br>alkaline pH           |  | 500 | 1951   | -3/+3   |       |
| CcP(H52L) pH 6                     |  | 508 | 1944   | -22/+22 | (5)   |
| SW Mb pH 8.4                       |  | 512 | 1944   |         | (6)   |
| SW Mb pH 7.0                       |  | 507 | 1947   |         |       |
| SW Mb pH 2.6                       |  | 489 | 1966   |         |       |
| SW Mb(H64A)                        |  | 490 | 1966   | -17/+19 | (7,8) |
| SW Mb(H64L)                        |  | 489 | 1966   | -18/+19 | (7-9) |
| Mtb KatG pH<br>7.2                 |  | 525 | 1923   |         | (10)  |
| Mtb KatG pH<br>8.0                 |  | 522 | 1926   |         | (11)  |
|                                    |  | 500 | 1956   |         |       |
| Tea peroxidase                     |  | 544 | 1892   |         | (12)  |
| Coprinus<br>cinereus<br>peroxidase |  | 519 | 1930.5 |         | (12)  |

$$^a \Delta(v_{\text{Fe-C WTopen}} - v_{\text{Fe-C WTclosed}}) / \Delta(v_{\text{C-O WTopen}} - v_{\text{C-O WTclosed}}).$$

$$^b \Delta(v_{\text{Fe-C mut}} - v_{\text{Fe-C WTopen}}) / \Delta(v_{\text{C-O mut}} - v_{\text{C-O WTopen}}).$$

$$^c \Delta(v_{\text{Fe-C mut}} - v_{\text{Fe-C WTclosed}}) / \Delta(v_{\text{C-O mut}} - v_{\text{C-O WTclosed}}).$$

## References

- (1) Feis, A., Rodriguez-Lopez, J. N., Thorneley, R. N. F., and Smulevich, G. (1998) The Distal Cavity Structure of Carbonyl Horseradish Peroxidase As Probed by the Resonance Raman Spectra of His 42 Leu and Arg 38 Leu Mutants, *Biochemistry* 37, 13575-13581.
- (2) Rodriguez-Lopez, J. N., George, S. J., and Thorneley, R. N. F. (1998) The structure of carbonyl horseradish peroxidase: spectroscopic and kinetic characterization of the carbon monoxide complexes of His-42Leu and Arg-38Leu mutants, *J. Biol. Inorg. Chem.* 3, 44-52.
- (3) Smulevich, G., Evangelista-Kirkup, R., English, A., and Spiro, T. G. (1986) Raman and infrared spectra of cytochrome c peroxidase-carbon monoxide adducts in alternative conformational states, *Biochemistry* 25, 4426-4430.
- (4) Smulevich, G., Mauro, J. M., Fishel, L. A., English, A. M., Kraut, J., and Spiro, T. G. (1988) Cytochrome c peroxidase mutant active site structures probed by resonance Raman and infrared signatures of the CO adducts, *Biochemistry* 27, 5486-5492.
- (5) Smulevich, G., Miller, M. A., Kraut, J., and Spiro, T. G. (1991) Conformational change and histidine control of heme chemistry in cytochrome c peroxidase: resonance Raman evidence from Leu-52 and Gly-181 mutants of cytochrome c peroxidase, *Biochemistry* 30, 9546-9558.
- (6) Spiro, T. G. and Wasbotten, I. H. (2005) CO as a vibrational probe of heme protein active sites, *J. Inorg. Biochem.* 99, 34-44.
- (7) Li, T., Quillin, M. L., Phillips, G. N., Jr., and Olson, J. S. (1994) Structural Determinants of the Stretching Frequency of CO Bound to Myoglobin, *Biochemistry* 33, 1433-1446.
- (8) Ling, J., Li, T., Olson, J. S., and Bocian, D. F. (1994) Identification of the iron-carbonyl stretch in distal histidine mutants of carbonmonoxymyoglobin, *Biochim Biophys Acta* 1188, 417-421.

- (9) Anderton, C. L., Hester, R. E., and Moore, J. N. (1997) A chemometric analysis of the resonance Raman spectra of mutant carbonmonoxy-myoglobins reveals the effects of polarity, *Biochim Biophys Acta* 1338, 107-120.
- (10) Kapetanaki, S. M., Chouchane, S., Yu, S., Zhao, X., Magliozzo, R. S., and Schelvis, J. P. M. (2005) Mycobacterium tuberculosis KatG(S315T) Catalase-Peroxidase Retains All Active Site Properties for Proper Catalytic Function, *Biochemistry* 44, 243-252.
- (11) Lukat-Rodgers, G. S., Wengenack, N. L., Rusnak, F., and Rodgers, K. R. (2001) Carbon monoxide adducts of KatG and KatG(S315T) as probes of the heme site and isoniazid binding, *Biochemistry* 40, 7149-7157.
- (12) Smulevich, G., Feis, A., and Howes, B. D. (2005) Fifteen years of Raman spectroscopy of engineered heme containing peroxidases: What have we learned? *Accounts of Chemical Research* 38, 433-440.
